# Supplementary material
Source: publisher figshare collection journal article supplement (https://frontiersin.figshare.com/ndownloader/files/14251091)
Supplement: Supplementary file [file 14251091]

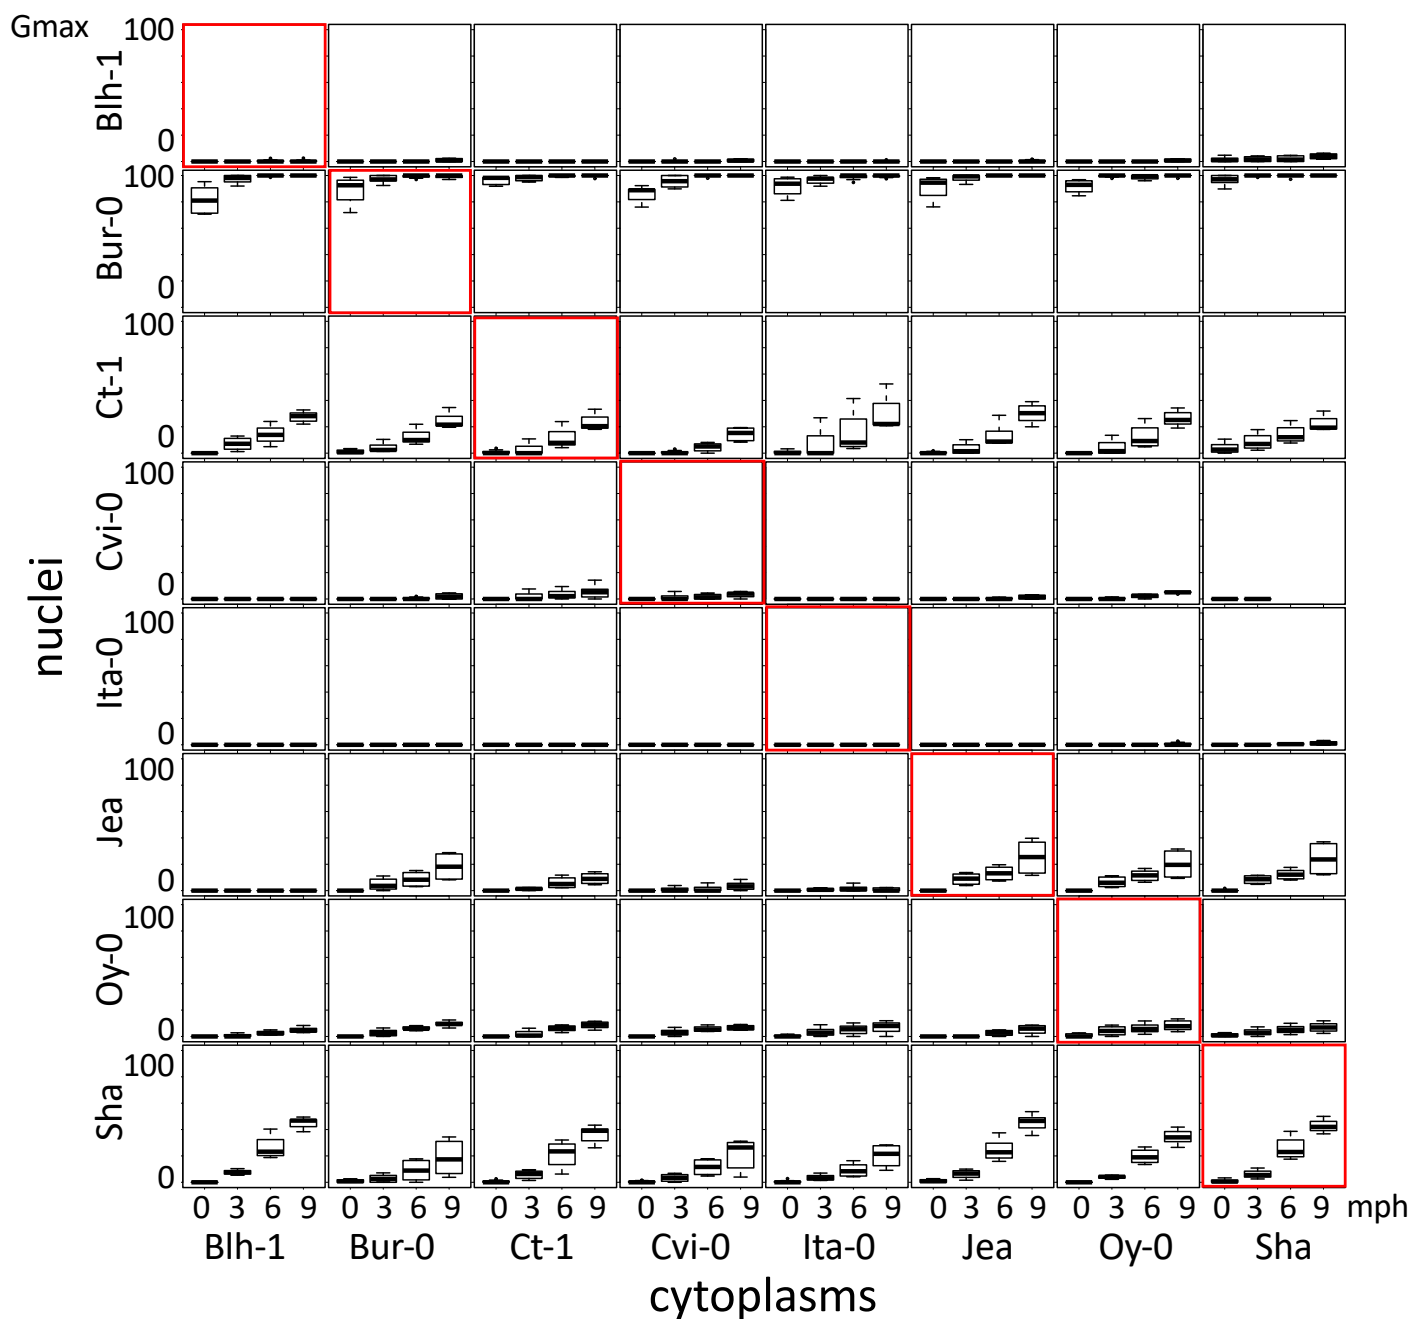

Fig. S2 Dormancy release during after ripening in cytoline series.

Each panel shows the maximum germination percentage at 25°C for one cytonuclear combination 0, 3, 6 and 9 months post-harvest (mph). Rows present cytolines sharing their nucleus and columns those sharing their cytoplasm. Natural accessions are framed in red.
